# Supplementary material for: Risk Factors of Secondary Cardiovascular Events in a Multi-Ethnic Asian Population with Acute Myocardial Infarction: A Retrospective Cohort Study from Malaysia
Source: MDPI journal article supplement (doi:10.3390/jcdd10060250), 2023-06-09
Supplement: s1 [file s1]

# Risk Factors of Secondary Cardiovascular Events in a Multi-ethnic Asian Population with Acute Myocardial Infarction: a Retrospective Cohort Study from Malaysia

## 1. Supplementary Table S1: Participating hospitals

| Region            | Included hospitals                                                                                                                                                                                                  |
|-------------------|---------------------------------------------------------------------------------------------------------------------------------------------------------------------------------------------------------------------|
| Northern region   | 1. Hospital Sultanah Bahiyah, Kedah<br>2. Hospital Raja Permaisuri Bainun, Perak                                                                                                                                    |
| East coast region | 1. Hospital Raja Perempuan Zainab II, Kelantan                                                                                                                                                                      |
| Central region    | 1. Hospital Kuala Lumpur, Wilayah Persekutuan Kuala Lumpur<br>2. Hospital Serdang, Selangor<br>3. Hospital Shah Alam, Selangor<br>4. Hospital Sungai Buloh, Selangor<br>5. Hospital Tengku Ampuan Rahimah, Selangor |
| Southern region   | 1. Hospital Sultanah Aminah, Johor                                                                                                                                                                                  |
| Borneo            | 1. Pusat Jantung Sarawak, Sarawak                                                                                                                                                                                   |

## 2. Supplementary Table S2: Baseline characteristics of cohort individuals by age group

| Variables                             | Age ≤50 years |             | Age >50 years |             |
|---------------------------------------|---------------|-------------|---------------|-------------|
|                                       | With MACE     | No MACE     | With MACE     | No MACE     |
|                                       | N=101         | N=667       | N=130         | N=720       |
| <b>Demography, n (%)</b>              |               |             |               |             |
| Male sex                              | 93 (92)       | 635 (95)    | 110 (87)      | 638 (89)    |
| Ethnicity                             |               |             |               |             |
| Bumiputera                            | 61 (60)       | 426 (64)    | 77 (59)       | 429 (60)    |
| Chinese                               | 7 (7)         | 95 (14)     | 22 (17)       | 118 (16)    |
| Indian                                | 33 (33)       | 146 (22)    | 31 (24)       | 173 (24)    |
| <b>Comorbidities, n (%)</b>           |               |             |               |             |
| Self-reported hypertension            | 41 (42)       | 160 (25)    | 66 (53)       | 289 (42)    |
| Self-reported diabetes                | 28 (29)       | 136 (21)    | 59 (48)       | 225 (33)    |
| Self-reported dyslipidaemia           | 21 (22)       | 110 (17)    | 47 (38)       | 188 (28)    |
| Smoking                               | 72 (74)       | 450 (70)    | 54 (44)       | 366 (54)    |
| Body mass index ≥25 kg/m <sup>2</sup> | 69 (75)       | 426 (72)    | 99 (84)       | 525 (84)    |
| <b>Blood parameters, mean (SD)</b>    |               |             |               |             |
| Total cholesterol, mmol/L             | 5.5 (1.7)     | 5.8 (1.5)   | 5.6 (1.8)     | 5.6 (1.6)   |
| LDL, mmol/L                           | 4.2 (1.8)     | 4.2 (1.4)   | 3.9 (1.7)     | 3.9 (1.4)   |
| HDL, mmol/L                           | 1.3 (0.5)     | 1.3 (0.4)   | 1.3 (0.3)     | 1.3 (0.4)   |
| Triglyceride, mmol/L                  | 2.1 (1.0)     | 2.3 (1.2)   | 2.0 (1.1)     | 2.1 (1.0)   |
| Lipoprotein (a), mmol/L               | 37.2 (28.2)   | 32.8 (28.1) | 36.1 (28.1)   | 33.3 (27.8) |
| HbA1c, %                              | 7.2 (2.4)     | 6.0 (2.1)   | 7.7 (2.3)     | 7.1 (2.1)   |
| <b>Blood parameters, n (%)</b>        |               |             |               |             |
| LDL > 2.6 mmol/L                      | 80 (89)       | 554 (92)    | 92 (81)       | 543 (84)    |
| Lipoprotein (a) > 30mg/dL             | 44 (51)       | 226 (40)    | 50 (46)       | 246 (41)    |
| HbA1c >6.5%                           | 32 (33)       | 222 (35)    | 70 (59)       | 285 (42)    |
| <b>Cardiac characteristics, n (%)</b> |               |             |               |             |
| NSTEMI                                | 39 (5)        | 217 (28)    | 61 (7)        | 259 (31)    |
| Left bundle branch block              | 1 (1)         | 7 (1)       | 5 (4)         | 5 (1)       |
| Any arrhythmia                        | 8 (8)         | 50 (8)      | 17 (13)       | 53 (7)      |
| Heart failure                         | 7 (7)         | 34 (5)      | 15 (12)       | 48 (7)      |
| LVEF in %, mean (SD)                  | 43.0 (13.1)   | 48.9 (10.7) | 44.7 (12.7)   | 47.6 (11.1) |
| LVEF ≤40%                             | 31 (46)       | 110 (22)    | 34 (40)       | 141 (27)    |
| LVEF 41–49%                           | 14 (21)       | 141 (28)    | 22 (26)       | 134 (25)    |
| LVEF ≥50%                             | 23 (34)       | 249 (50)    | 30 (35)       | 254 (48)    |
| Cardiogenic shock                     | 16 (16)       | 62 (9)      | 16 (12)       | 67 (9)      |
| Cardiac arrest                        | 1 (1)         | 12 (2)      | 3 (2)         | 15 (2)      |

Abbreviations: HDL – high density lipoprotein; LDL – low density lipoprotein; LVEF – left ventricular ejection fraction; MACE – major adverse cardiovascular events; SBP – systolic blood pressure.

Categorical variables are presented as counts (column percentages). Continuous variables are presented as mean (standard deviation).

### 3. Supplementary Table S3: Baseline characteristics of cohort individuals by ethnicity

| Variables                             | Bumiputera  |             | Chinese     |             | Indian      |             |
|---------------------------------------|-------------|-------------|-------------|-------------|-------------|-------------|
|                                       | With MACE   | No MACE     | With MACE   | No MACE     | With MACE   | No MACE     |
|                                       | N=138       | N=855       | N=29        | N=213       | N=64        | N=319       |
| <i>Demography</i>                     |             |             |             |             |             |             |
| Age (years), mean (SD)                | 51.1 (9.2)  | 49.7 (9.2)  | 54.5 (6.5)  | 50.6 (9.3)  | 50.9 (9.3)  | 49.8 (10.0) |
| Age ≤50 years, n (%)                  | 61 (44)     | 426 (50)    | 7 (24)      | 95 (44.6)   | 33 (52)     | 173 (54)    |
| Male sex, n (%)                       | 122 (88)    | 788 (92)    | 25 (86)     | 194 (91.1)  | 56 (88)     | 291 (91)    |
| <i>Comorbidities, n (%)</i>           |             |             |             |             |             |             |
| Self-reported hypertension            | 60 (45)     | 263 (32)    | 15 (53)     | 83 (41.3)   | 32 (53)     | 103 (33)    |
| Self-reported diabetes                | 50 (38)     | 209 (26)    | 12 (43)     | 50 (24.9)   | 25 (42)     | 102 (33)    |
| Self-reported dyslipidaemia           | 42 (32)     | 184 (22)    | 12 (43)     | 45 (22.4)   | 14 (23)     | 69 (22)     |
| Smoking                               | 78 (59)     | 504 (62)    | 11 (39)     | 123 (62.8)  | 37 (62)     | 189 (61)    |
| BMI ≥25 kg/m <sup>2</sup>             | 101 (80)    | 585 (77)    | 21 (81)     | 133 (76)    | 46 (79)     | 233 (83)    |
| <i>Blood parameters, mean (SD)</i>    |             |             |             |             |             |             |
| Total cholesterol, mmol/L             | 5.6 (1.9)   | 5.8 (1.9)   | 5.5 (2.0)   | 5.8 (1.5)   | 5.4 (1.4)   | 5.6 (1.4)   |
| LDL, mmol/L                           | 4.2 (1.9)   | 3.9 (1.9)   | 5.5 (2.0)   | 4.1 (1.5)   | 3.8 (1.3)   | 3.9 (1.2)   |
| HDL, mmol/L                           | 1.2 (0.3)   | 1.3 (0.3)   | 1.2 (0.3)   | 1.3 (0.3)   | 1.3 (0.6)   | 1.3 (0.4)   |
| Triglyceride, mmol/L                  | 2.1 (1.1)   | 2.2 (1.1)   | 2.0 (1.1)   | 2.3 (1.4)   | 2.0 (0.8)   | 2.2 (1.0)   |
| Lipoprotein (a), mmol/L               | 35.3 (26.1) | 33.8 (29.6) | 39.6 (38.8) | 30.2 (23.2) | 38.0 (27.5) | 33.1 (26.2) |
| HbA1c, %                              | 7.4 (2.3)   | 7.0 (2.3)   | 7.7 (2.6)   | 7.0 (2.1)   | 7.5 (2.3)   | 7.1 (2.0)   |
| <i>Blood parameters, n (%)</i>        |             |             |             |             |             |             |
| LDL > 2.6 mmol/L                      | 105 (85)    | 676 (88)    | 18 (72)     | 170 (86)    | 49 (89)     | 251 (87)    |
| Lipoprotein (a) > 30mg/dL             | 58 (48)     | 289 (41)    | 10 (44)     | 70 (38)     | 26 (48)     | 113 (42)    |
| HbA1c >6.5%                           | 60 (46)     | 298 (37)    | 15 (58)     | 82 (39)     | 27 (47)     | 127 (42)    |
| <i>Cardiac characteristics, n (%)</i> |             |             |             |             |             |             |
| NSTEMI                                | 48 (5)      | 247 (27)    | 17 (7)      | 95 (39)     | 25 (7)      | 105 (27)    |
| LBBB                                  | 4 (3)       | 6 (1)       | 1 (4)       | 4 (2)       | 1 (2)       | 2 (1)       |
| Any arrhythmia                        | 14 (10)     | 74 (9)      | 2 (7)       | 14 (7)      | 9 (14)      | 15 (5)      |
| Heart failure                         | 10 (7)      | 46 (5)      | 4 (14)      | 18 (9)      | 8 (13)      | 18 (6)      |
| LVEF in %, mean (SD)                  | 44.7 (12.2) | 48.4 (12.2) | 39.4 (10.5) | 46.6 (11.1) | 44.8 (14.9) | 49.2 (10.4) |
| LVEF ≤40%                             | 35 (39)     | 161 (25)    | 12 (56)     | 50 (31)     | 18 (42)     | 40 (18)     |
| LVEF 41–49%                           | 20 (23)     | 179 (28)    | 6 (27)      | 29 (18)     | 10 (23)     | 67 (30)     |
| LVEF ≥50%                             | 34 (38)     | 303 (47)    | 4 (18)      | 82 (51)     | 15 (35)     | 118 (52)    |
| Cardiogenic shock                     | 19 (14)     | 84 (10)     | 4 (14)      | 16 (8)      | 9 (14)      | 29 (9)      |
| Cardiac arrest                        | 2 (2)       | 20 (2)      | 1 (4)       | 2 (1)       | 1 (2)       | 5 (2)       |

Abbreviations: BMI – body mass index; HDL – high density lipoprotein; LBBB – left bundle branch block; LDL – low density lipoprotein; LVEF – left ventricular ejection fraction; MACE – major adverse cardiovascular events; SBP – systolic blood pressure.

Categorical variables are presented as counts (column percentages). Continuous variables are presented as mean (standard deviation).

#### 4. Supplementary Table S4: Associations between risk factors of first MI and risk of MACE

| Variables                                          | Model 1           | Model 2                 | Model 3                                                           | Model 4                                                 |
|----------------------------------------------------|-------------------|-------------------------|-------------------------------------------------------------------|---------------------------------------------------------|
| <b>Adjusted variables</b>                          | None              | Age, sex, and ethnicity | Model 2 + hypertension, diabetes, BMI, smoking, Lp (a), and HbA1c | Model 3 + mutual adjustments of cardiac characteristics |
| <b>Demographics</b>                                |                   |                         |                                                                   |                                                         |
| Age >50 years vs ≤50 years                         | 1.17 (0.90–1.53)  | 1.14 (0.88–1.49)        |                                                                   |                                                         |
| Female                                             | 1.51 (1.01–2.24)  | 1.47 (0.98–2.18)        |                                                                   |                                                         |
| Chinese vs Bumiputera                              | 0.86 (0.57–1.28)  | 0.84 (0.57–1.26)        |                                                                   |                                                         |
| Indian vs Bumiputera                               | 1.21 (0.90–1.63)  | 1.21 (0.90–1.62)        |                                                                   |                                                         |
| <b>Comorbidities</b>                               |                   |                         |                                                                   |                                                         |
| Hypertension                                       | 1.77 (1.36–2.30)  | 1.60 (1.22–2.12)        |                                                                   |                                                         |
| Diabetes                                           | 1.63 (1.23–2.14)  | 1.46 (1.09–1.97)        |                                                                   |                                                         |
| Dyslipidaemia                                      | 1.50 (1.11–2.02)  | 1.41 (0.95–2.08)        |                                                                   |                                                         |
| BMI ≥25 kg/m <sup>2</sup> vs <25 kg/m <sup>2</sup> | 1.04 (0.74–1.45)  | 1.05 (0.52–2.14)        |                                                                   |                                                         |
| Smoking                                            | 0.82 (0.63–1.08)  | 0.93 (0.66–1.30)        |                                                                   |                                                         |
| <b>Blood Parameters</b>                            |                   |                         |                                                                   |                                                         |
| LDL >2.6mmol/L vs ≤2.6mmol/L                       | 0.84 (0.26–2.77)  | 0.88 (0.27–2.83)        |                                                                   |                                                         |
| Lp(a) >30mg/dL vs ≤30mg/dL                         | 1.06 (0.60–1.87)  | 1.05 (0.59–1.86)        |                                                                   |                                                         |
| HbA1c >6.5% vs ≤6.5%                               | 1.36 (1.01–1.85)  | 1.29 (0.94–1.76)        |                                                                   |                                                         |
| <b>Cardiac Characteristics</b>                     |                   |                         |                                                                   |                                                         |
| NSTEMI vs STEMI                                    | 1.41 (1.08–1.83)  | 1.37 (1.05–1.79)        | 1.32 (1.01–1.73)                                                  | 1.57 (1.07–2.30)                                        |
| Right bundle branch block                          | 2.37 (1.16–4.81)  | 2.36 (1.16–4.82)        | 2.09 (1.02–4.29)                                                  | 1.88 (0.89–3.95)                                        |
| Left bundle branch block                           | 2.85 (1.26–6.43)  | 2.98 (1.32–6.75)        | 2.86 (1.25–6.55)                                                  | 1.88 (0.74–4.76)                                        |
| 2 <sup>nd</sup> degree heart block                 | 2.88 (0.71–11.67) | 2.70 (0.66–10.99)       | 2.45 (0.59–10.16)                                                 | 2.09 (0.48–9.14)                                        |
| Atrial fibrillation                                | 0.71 (0.23–2.24)  | 0.67 (0.21–2.11)        | 0.67 (0.21–2.13)                                                  | 0.57 (0.17–1.85)                                        |
| Ventricular fibrillation                           | 1.43 (0.73–2.80)  | 1.44 (0.73–2.82)        | 1.51 (0.76–3.00)                                                  | 1.21 (0.56–2.63)                                        |
| Supraventricular tachycardia                       | 1.39 (0.69–2.83)  | 1.49 (0.73–3.04)        | 1.58 (0.77–3.23)                                                  | 1.38 (0.64–2.96)                                        |
| Heart failure                                      | 1.59 (1.02–2.47)  | 1.54 (0.99–2.41)        | 1.47 (0.94–2.30)                                                  | 1.18 (0.69–2.01)                                        |
| LVEF ≤40% vs ≥50%                                  | 2.11 (0.33–13.34) | 2.19 (0.34–14.21)       | 2.20 (0.33–14.56)                                                 | 2.24 (0.27–18.39)                                       |
| LVEF 41–49% vs ≥50%                                | 1.18 (0.41–3.43)  | 1.21 (0.41–3.58)        | 1.19 (0.40–3.53)                                                  | 1.30 (0.40–4.23)                                        |
| Cardiogenic shock                                  | 1.56 (1.07–2.27)  | 1.56 (1.07–2.26)        | 1.56 (1.07–2.27)                                                  | 1.49 (0.99–2.26)                                        |
| Cardiac arrest                                     | 0.94 (0.35–2.53)  | 0.93 (0.34–2.50)        | 0.91 (0.33–2.47)                                                  | 0.82 (0.29–2.36)                                        |

Abbreviations: BMI – body mass index; LDL – low density lipoprotein; Lp(a) – lipoprotein (a); LVEF – left ventricular ejection fraction; MACE – major adverse cardiovascular events.

Values are presented as Hazard Ratio(95% Confidence Interval)

Model 1: Unadjusted Cox regression analysis

Model 2: Cox regression adjusted for age, sex, and ethnicity

Model 3: Cox regression adjusted for Model 2 + hypertension, diabetes, BMI, smoking, lipoprotein (a), and HbA1c

Model 4: Cox regression adjusted for Model 3 + mutually adjusted cardiac characteristics

Dark Background: No comparisons could be made for those coloured as it's the same variables.

## 5. Supplementary Table S5: Associations between risk factors of first MI and risk of MACE by age

| Risk Factors              | Age Group     | Model 2             |         | Model 3             |         |
|---------------------------|---------------|---------------------|---------|---------------------|---------|
|                           |               | HR (95%CI)          | p-value | HR (95%CI)          | p-value |
| Comorbidities             |               |                     |         |                     |         |
| Hypertension              | Age ≤50 years | 1.92 (1.29–2.86)    | 0.265   |                     |         |
|                           | Age >50 years | 0.90 (0.61–1.33)    |         |                     |         |
| Diabetes                  | Age ≤50 years | 1.42 (0.93–2.19)    | 0.756   |                     |         |
|                           | Age >50 years | 1.15 (0.74–1.77)    |         |                     |         |
| Dyslipidaemia             | Age ≤50 years | 1.22 (0.76–1.96)    | 0.800   |                     |         |
|                           | Age >50 years | 1.17 (0.71–1.94)    |         |                     |         |
| BMI ≥25 kg/m²             | Age ≤50 years | 1.03 (0.65–1.62)    | 0.625   |                     |         |
|                           | Age >50 years | 1.11 (0.83–1.49)    |         |                     |         |
| Smoking                   | Age ≤50 years | 1.12 (0.72–1.75)    | 0.097   |                     |         |
|                           | Age >50 years | 0.93 (0.66–1.32)    |         |                     |         |
| Blood Parameters          |               |                     |         |                     |         |
| Lp(a) >30mg/dL            | Age ≤50 years | 1.17 (0.79–1.73)    | 0.778   |                     |         |
|                           | Age >50 years | 1.10 (0.76–1.60)    |         |                     |         |
| HbA1c >6.5%               | Age ≤50 years | 0.81 (0.53–1.24)    | 0.041   |                     |         |
|                           | Age >50 years | 1.57 (1.03–2.38)    |         |                     |         |
| Cardiac Characteristics   |               |                     |         |                     |         |
| NSTEMI                    | Age ≤50 years | 1.28 (0.86–1.91)    | 0.605   | 1.23 (0.82–1.83)    | 0.612   |
|                           | Age >50 years | 1.23 (0.82–1.85)    |         | 1.10 (0.73–1.67)    |         |
| RBBB                      | Age ≤50 years | 2.11 (0.52–0.57)    | 0.843   | 2.15 (0.53–8.81)    | 0.966   |
|                           | Age >50 years | 1.31 (0.27–6.53)    |         | 1.04 (0.21–5.22)    |         |
| LBBB                      | Age ≤50 years | 1.00 (0.14–7.17)    | 0.093   | 1.02 (0.14–7.34)    | 0.127   |
|                           | Age >50 years | 5.53 (0.64–47.50)   |         | 4.39 (0.50–38.36)   |         |
| 2 <sup>nd</sup> degree HB | Age ≤50 years | 16.17 (2.24–116.73) | 0.136   | 18.27 (2.51–133.07) | 0.108   |
|                           | Age >50 years | 0.11 (0.01–1.81)    |         | 0.08 (0.01–1.33)    |         |
| LVEF ≤40%                 | Age ≤50 years | 1.14 (0.74–1.74)    | 0.577   | 1.11 (0.72–1.69)    | 0.684   |
|                           | Age >50 years | 1.03 (0.71–1.50)    |         | 0.96 (0.66–1.40)    |         |
| Cardiogenic shock         | Age ≤50 years | 1.77 (1.04–3.02)    | 0.539   | 1.74 (1.02–2.98)    | 0.656   |
|                           | Age >50 years | 0.94 (0.47–1.87)    |         | 0.88 (0.44–1.77)    |         |

Abbreviations: BMI – body mass index; HB – heart block; LBBB – left-bundle branch block; Lp(a) – lipoprotein (a); LVEF – left ventricular ejection fraction; MACE – major adverse cardiovascular events; RBBB – right bundle branch block.

Model 2: Cox regression adjusted for sex and ethnicity

Model 3: Cox regression adjusted for Model 2 + hypertension, diabetes, BMI, smoking, HbA1c and lipoprotein (a)

Subgroup analysis was performed using multivariable Cox regression analysis with addition of age-group as interaction term and linear combinations of model parameters

P-value was calculated using Wald test. P-value of >0.05 demonstrates no difference between age ≤50 years and age >50 years.

Dark Background: No comparisons could be made for those coloured as it's the same variables.

## 6. Supplementary Table S6: Associations between risk factors of first MI and risk of MACE by sex

| Risk Factors              | Gender | Model 2           |          |
|---------------------------|--------|-------------------|----------|
|                           |        | HR (95%CI)        | p-value* |
| Comorbidities             |        |                   |          |
| Hypertension              | Female | 1.46 (0.91–2.33)  | 0.048    |
|                           | Male   | 1.55 (1.17–2.06)  |          |
|                           |        |                   |          |
| Diabetes                  | Female | 1.72 (1.07–2.77)  | 0.050    |
|                           | Male   | 1.36 (1.01–1.83)  |          |
|                           |        |                   |          |
| Dyslipidaemia             | Female | 1.69 (0.95–3.00)  | 0.410    |
|                           | Male   | 1.22 (0.89–1.66)  |          |
|                           |        |                   |          |
| Body mass index ≥25 kg/m² | Female | 1.22 (0.78–1.91)  | 0.016    |
|                           | Male   | 1.07 (0.75–1.54)  |          |
|                           |        |                   |          |
| Smoking                   | Female | 1.66 (0.41–6.71)  | 0.764    |
|                           | Male   | 0.85 (0.64–1.13)  |          |
|                           |        |                   |          |
| Blood Parameters          |        |                   |          |
| Lipoprotein (a) >30mg/dL  | Female | 1.10 (0.61–2.01)  | 0.184    |
|                           | Male   | 1.19 (0.91–1.57)  |          |
|                           |        |                   |          |
| HbA1c >6.5%               | Female | 1.45 (0.89–2.36)  | 0.884    |
|                           | Male   | 1.12 (0.84–1.48)  |          |
|                           |        |                   |          |
| Cardiac Characteristics   |        |                   |          |
| NSTEMI                    | Female | 1.22 (0.71–2.09)  | 0.511    |
|                           | Male   | 1.43 (1.08–1.89)  |          |
|                           |        |                   |          |
| Left bundle branch block  | Female | 2.32 (0.27–20.06) | 0.688    |
|                           | Male   | 2.81 (1.15–6.84)  |          |
|                           |        |                   |          |
| LVEF ≤40%                 | Female | 1.64 (0.93–2.87)  | 0.207    |
|                           | Male   | 1.09 (0.80–1.47)  |          |
|                           |        |                   |          |
| Cardiogenic shock         | Female | 1.75 (0.61–5.01)  | 0.739    |
|                           | Male   | 1.52 (1.02–2.27)  |          |

Abbreviations: LVEF – left ventricular ejection fraction; MACE – major adverse cardiovascular events.

Model 2: Cox regression adjusted for age, and ethnicity

Subgroup analysis was performed using multivariable Cox regression analysis with addition of gender as interaction term and linear combinations of model parameters

P-value was calculated using Wald test. P-value of >0.05 demonstrates no difference between male and female groups.

## 7. Supplementary Table S7: Associations between risk factors of first MI and risk of MACE by ethnicity

| Risk Factors                          | Ethnic Group | Model 2          |          |
|---------------------------------------|--------------|------------------|----------|
|                                       |              | HR (95%CI)       | p-value* |
| Comorbidities                         |              |                  |          |
| Hypertension                          | Bumiputera   | 1.53 (1.08–2.15) | 0.697    |
|                                       | Chinese      | 0.79 (0.45–1.39) |          |
|                                       | Indian       | 1.35 (0.88–2.06) |          |
| Diabetes                              | Bumiputera   | 1.47 (1.03–2.09) | 0.916    |
|                                       | Chinese      | 0.94 (0.50–1.77) |          |
|                                       | Indian       | 1.18 (0.75–1.86) |          |
| Dyslipidaemia                         | Bumiputera   | 1.31 (0.91–1.89) | 0.282    |
|                                       | Chinese      | 1.01 (0.58–2.00) |          |
|                                       | Indian       | 0.95 (0.53–1.71) |          |
| Body mass index ≥25 kg/m <sup>2</sup> | Bumiputera   | 1.01 (0.66–1.56) | 0.706    |
|                                       | Chinese      | 0.86 (0.55–1.33) |          |
|                                       | Indian       | 1.15 (0.82–1.59) |          |
| Smoking                               | Bumiputera   | 0.89 (0.63–1.27) | 0.109    |
|                                       | Chinese      | 0.57 (0.30–1.07) |          |
|                                       | Indian       | 1.30 (0.89–1.91) |          |
| Blood Parameters                      |              |                  |          |
| Lipoprotein (a) >30mg/dL              | Bumiputera   | 1.09 (0.78–1.53) | 0.969    |
|                                       | Chinese      | 0.86 (0.49–1.53) |          |
|                                       | Indian       | 1.28 (0.82–2.00) |          |
| HbA1c >6.5%                           | Bumiputera   | 1.18 (0.84–1.67) | 0.457    |
|                                       | Chinese      | 0.95 (0.54–1.67) |          |
|                                       | Indian       | 1.02 (0.65–1.60) |          |
| Cardiac Characteristics               |              |                  |          |
| NSTEMI                                | Bumiputera   | 1.42 (1.01–2.00) | 0.762    |
|                                       | Chinese      | 0.86 (0.50–1.48) |          |
|                                       | Indian       | 1.09 (0.68–1.74) |          |
| Left bundle branch block              | Bumiputera   | 3.58 (1.33–9.70) | 0.849    |
|                                       | Chinese      | 0.47 (0.05–4.19) |          |
|                                       | Indian       | 0.89 (0.10–7.97) |          |
| LVEF ≤40%                             | Bumiputera   | 0.81 (0.56–1.16) | 0.052    |
|                                       | Chinese      | 0.95 (0.54–1.68) |          |
|                                       | Indian       | 1.67 (1.10–2.52) |          |
| Cardiogenic shock                     | Bumiputera   | 1.50 (0.92–2.43) | 0.917    |
|                                       | Chinese      | 1.06 (0.36–3.14) |          |
|                                       | Indian       | 1.25 (0.56–2.77) |          |

Abbreviations: LVEF – left ventricular ejection fraction; MACE – major adverse cardiovascular events.

Model 2: Cox regression adjusted for age and sex

Subgroup analysis was performed using multivariable Cox regression analysis with addition of ethnic group as interaction term and linear combinations of model parameters  
P-value was calculated using Wald test. P-value of  $>0.05$  demonstrates no difference between Bumiputera and other ethnic groups.
